# Supplementary material for: Potential Antioxidant and Anti-Inflammatory Effects of Spilanthes acmella and Its Health Beneficial Effects: A Review
Source: PubMed Central journal article supplement (PMC8036807; doi:10.3390/ijerph18073532), 2021-03-29
Supplement: ijerph-18-03532-s001.pdf [file ijerph-18-03532-s001.pdf]

# SUPPLEMENTARY MATERIAL (S1)

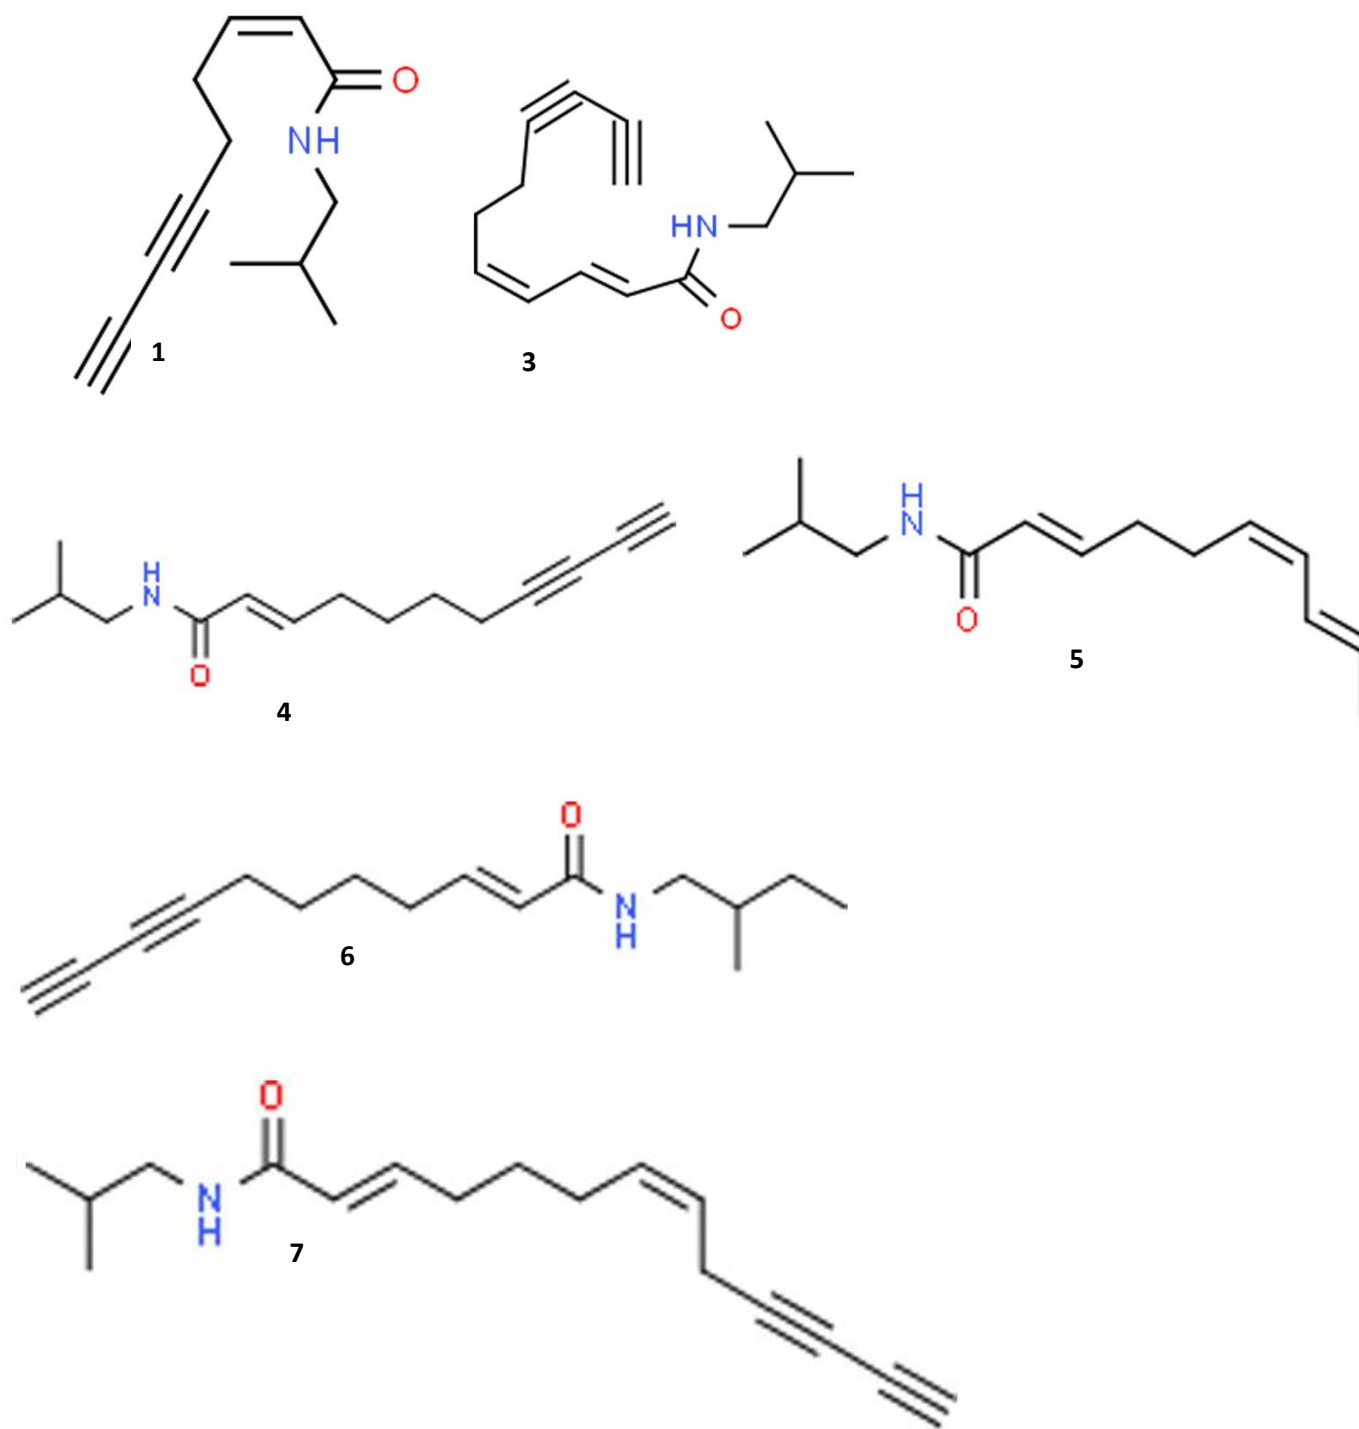

Figure S1: Structure of phytochemicals in *S. acmella*

# SUPPLEMENTARY MATERIAL (S1)

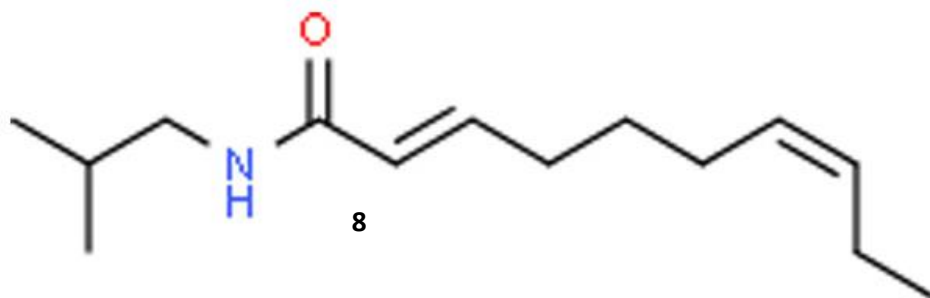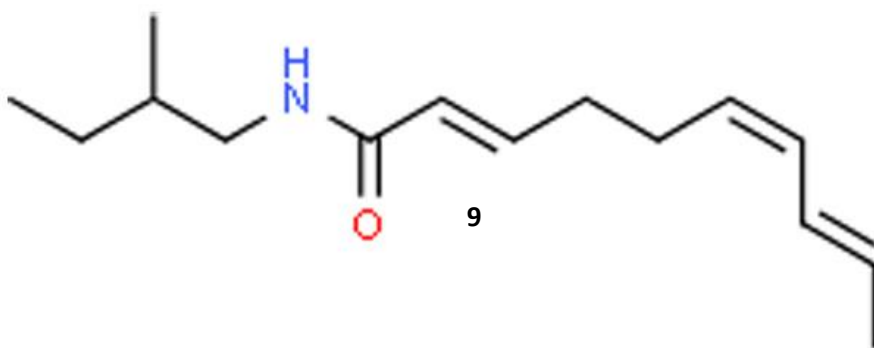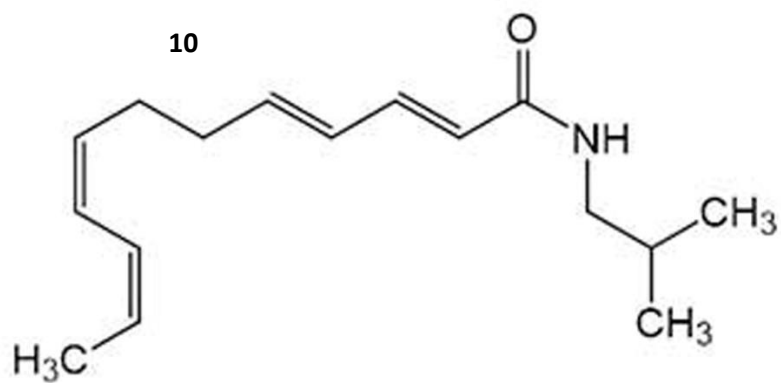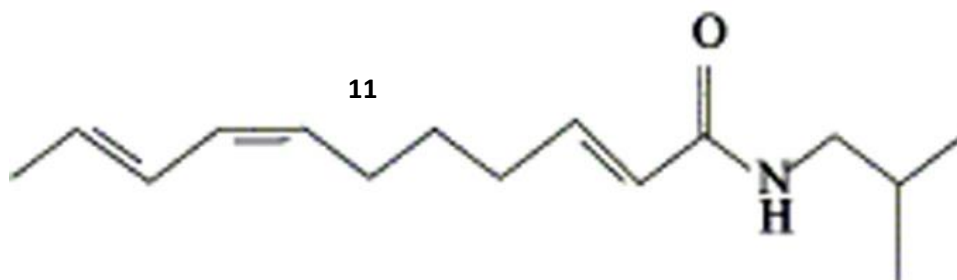

Figure S1: Structure of phytochemicals in *S. acmella*

# SUPPLEMENTARY MATERIAL (S1)

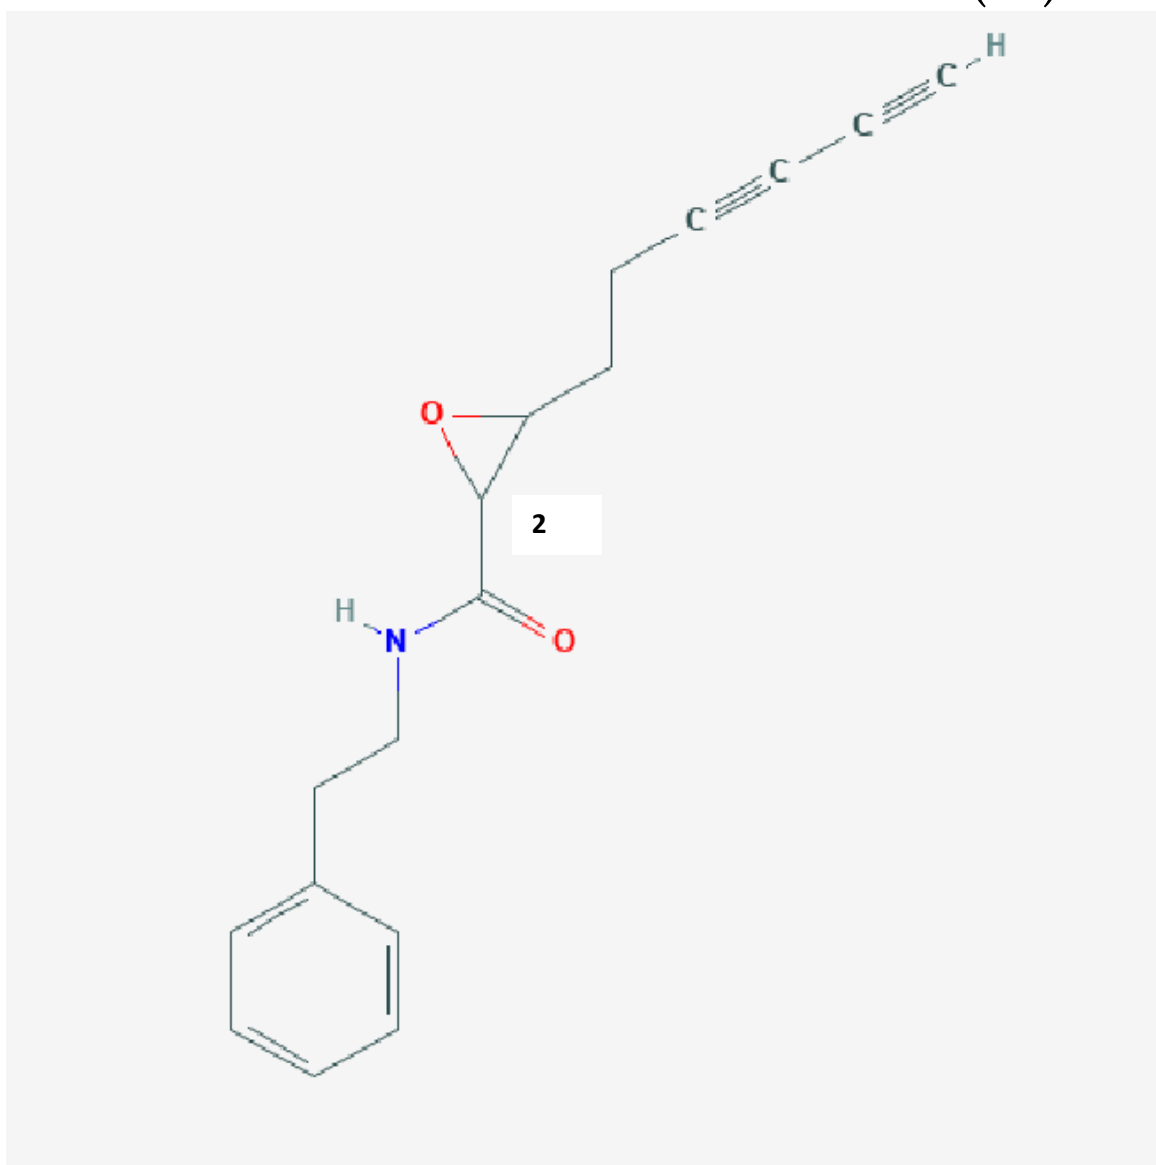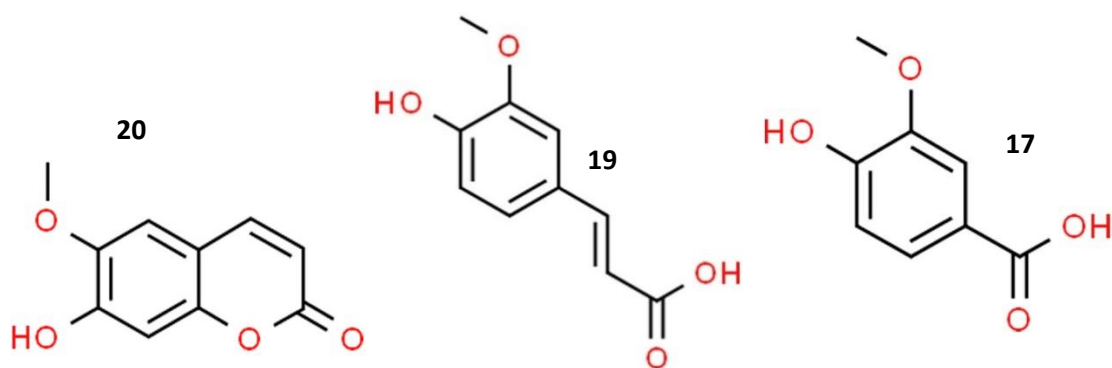

Figure S1: Structure of phytochemicals in *S. acmella*

# SUPPLEMENTARY MATERIAL (S1)

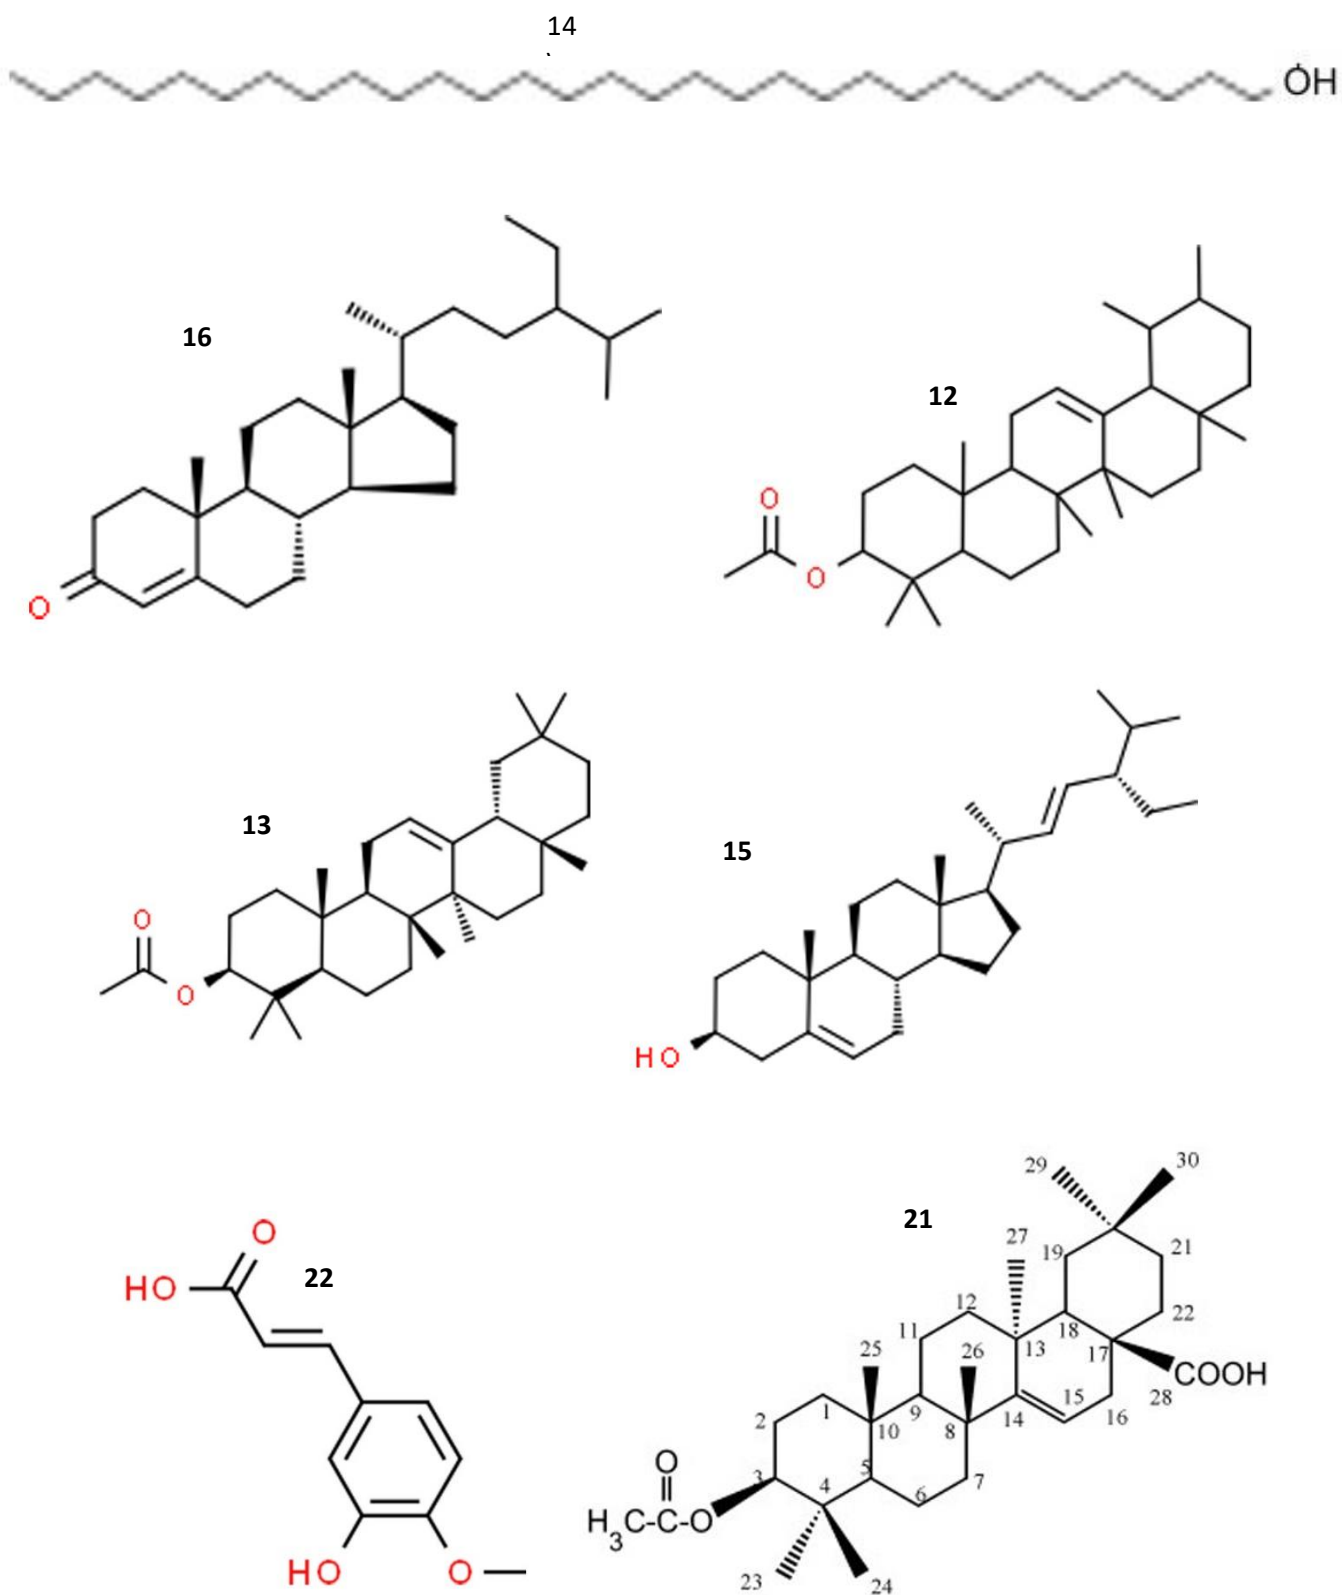

Figure S1: Structure of phytochemicals in *S. acmella*

# SUPPLEMENTARY MATERIAL (S1)

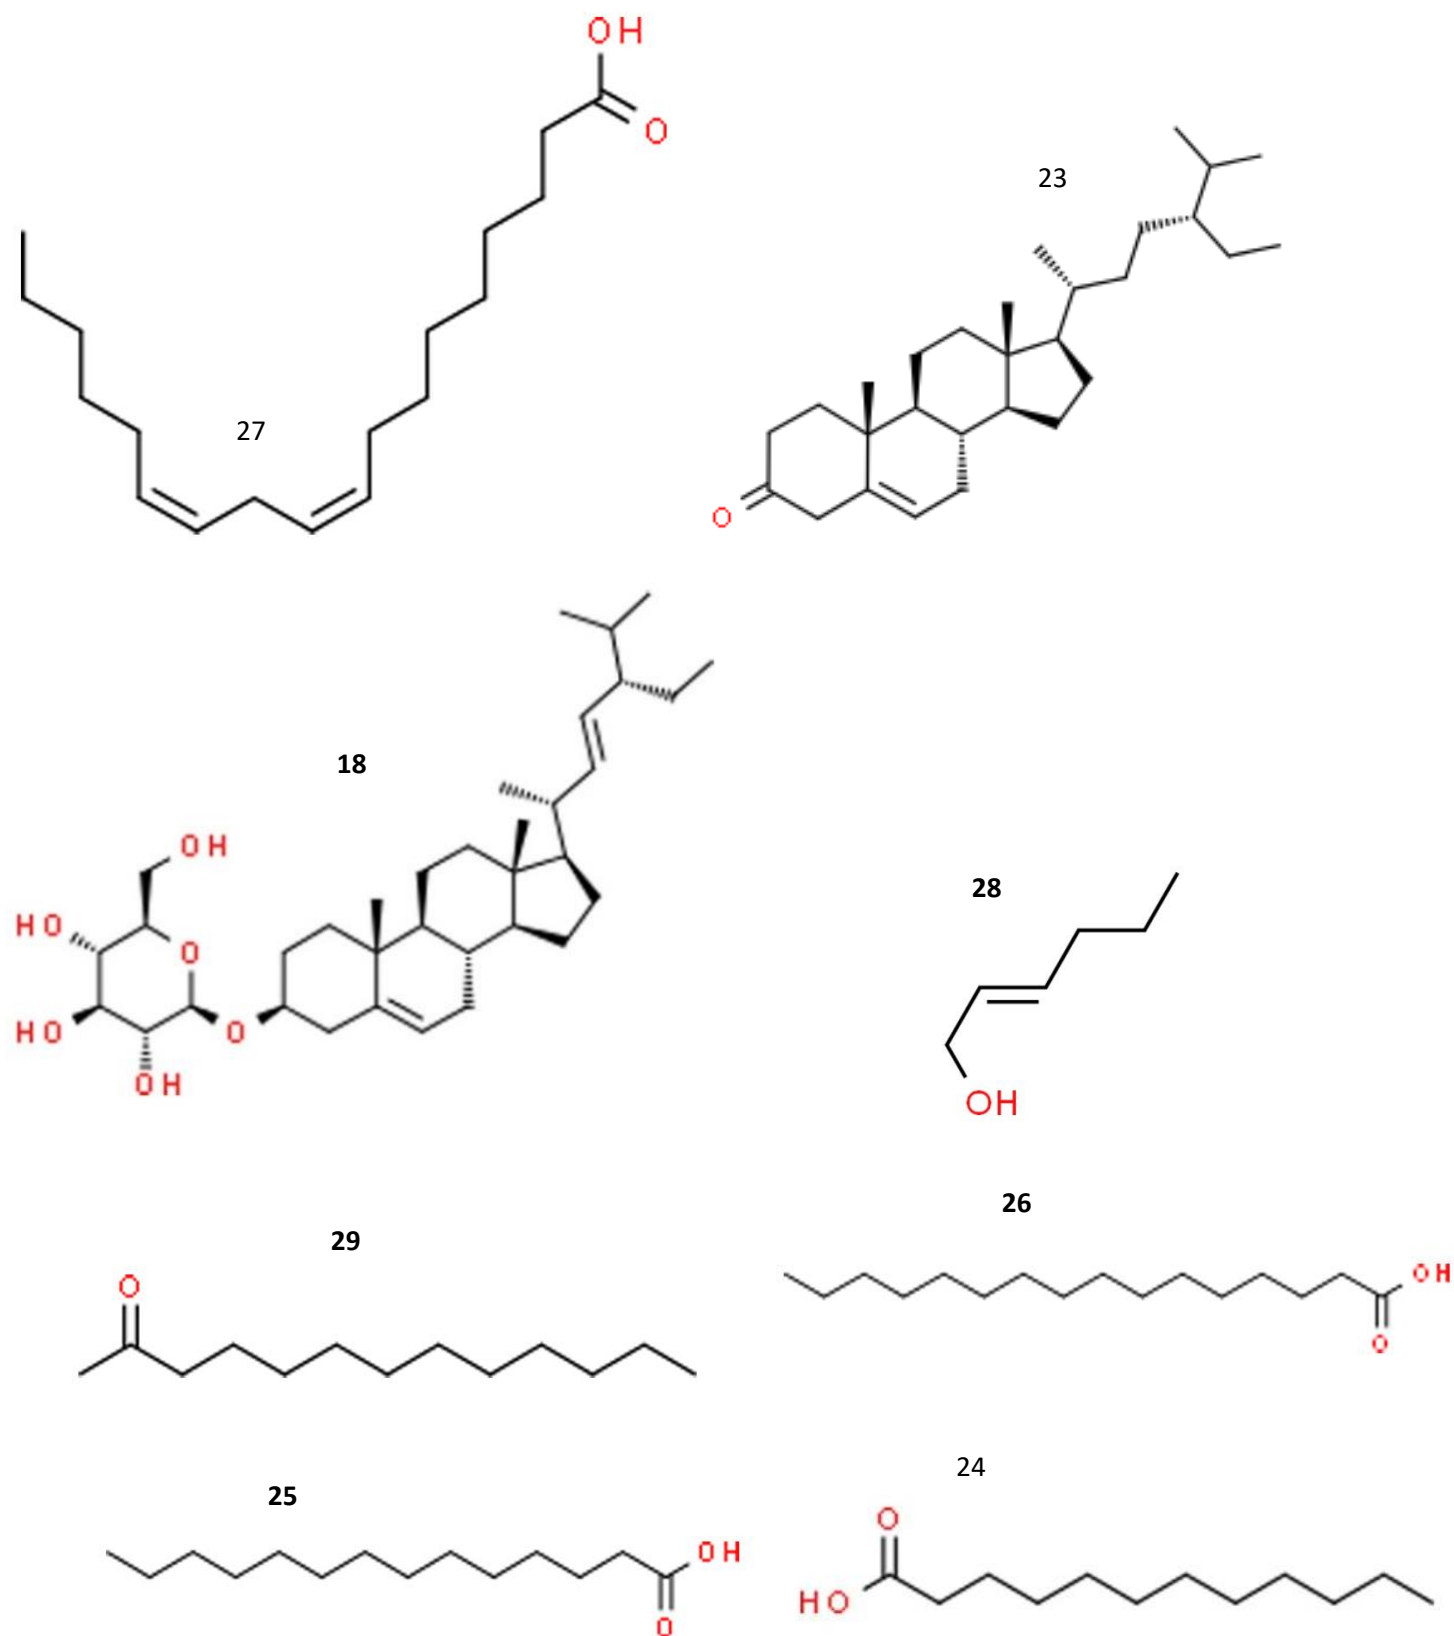

Figure S1: Structure of phytochemicals in *S. acmella*

# SUPPLEMENTARY MATERIAL (S1)

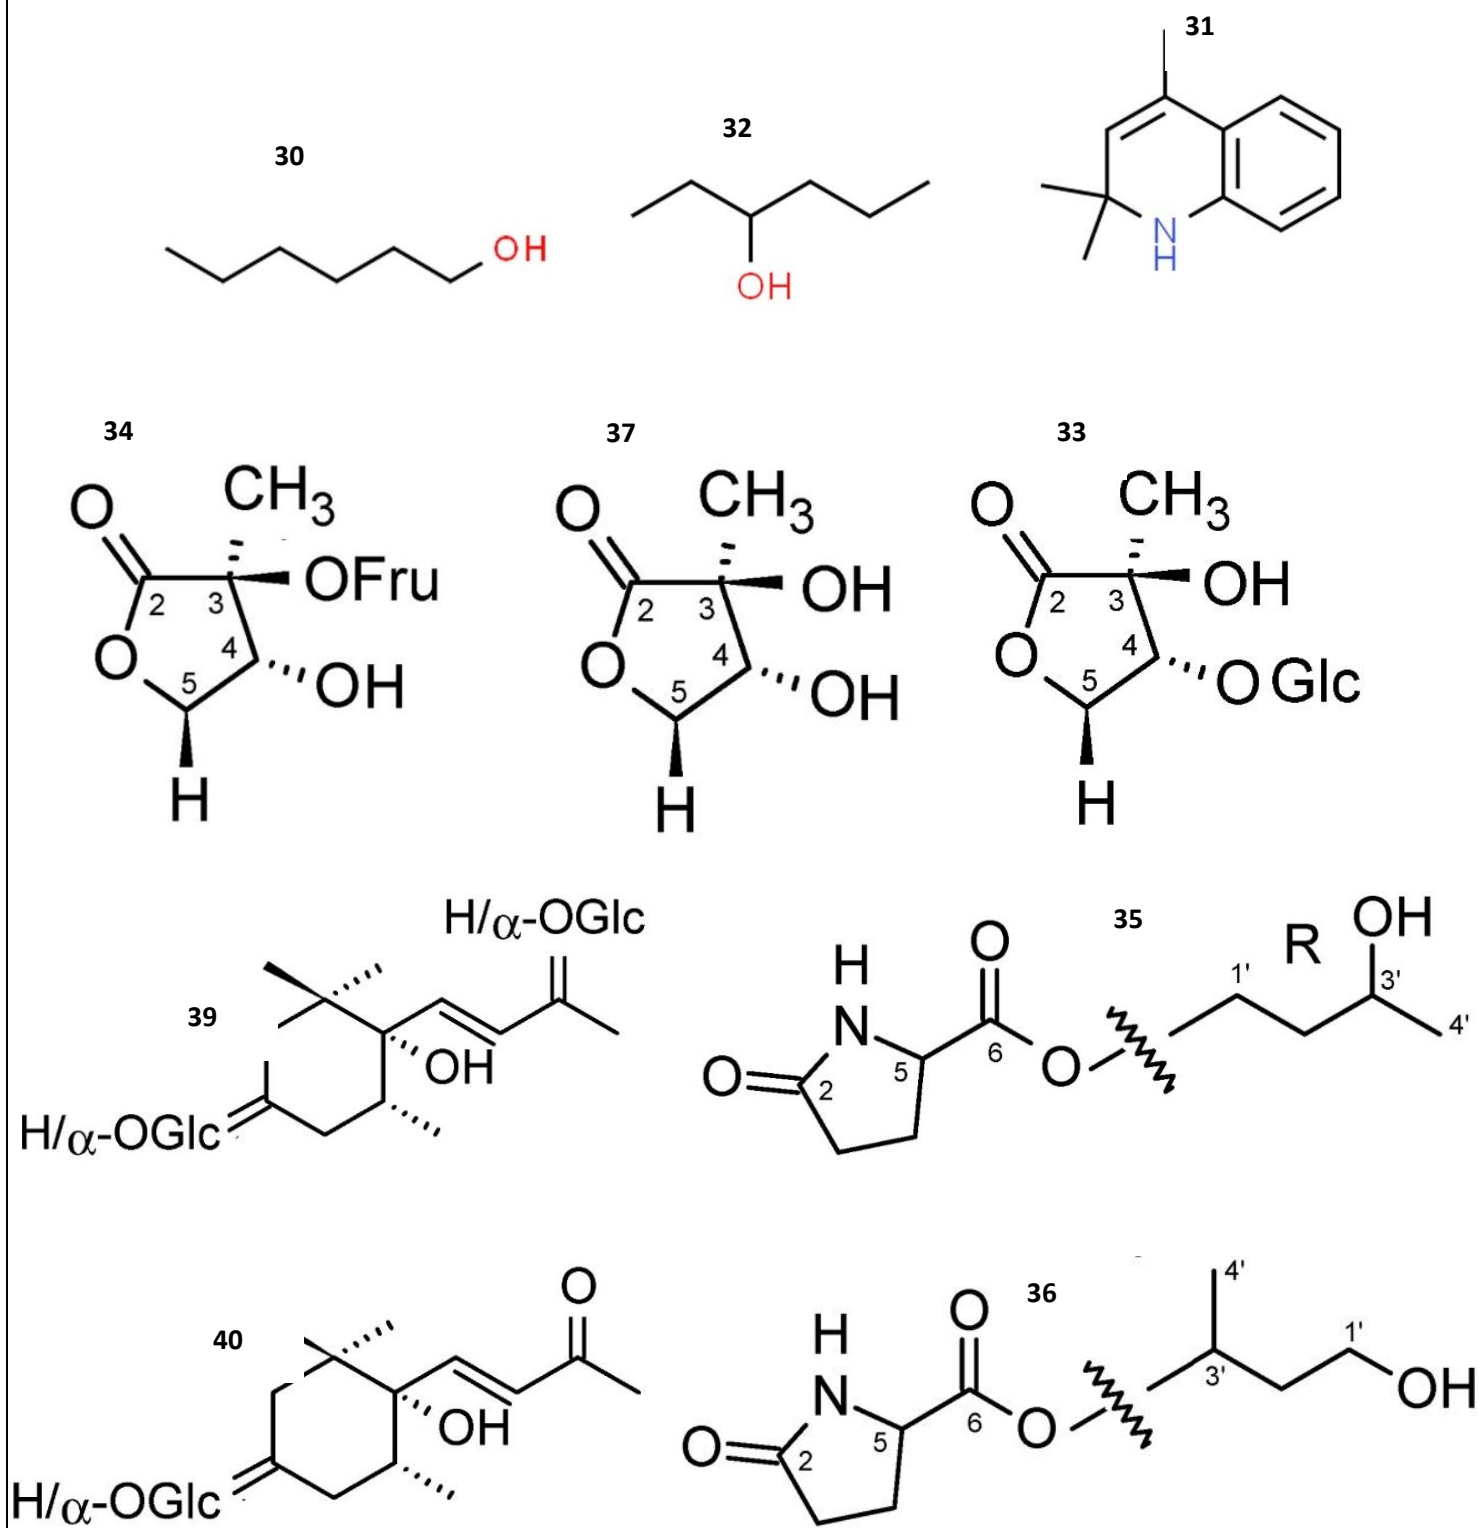

Figure S1: Structure of phytochemicals in *S. acmella*

# SUPPLEMENTARY MATERIAL (S1)

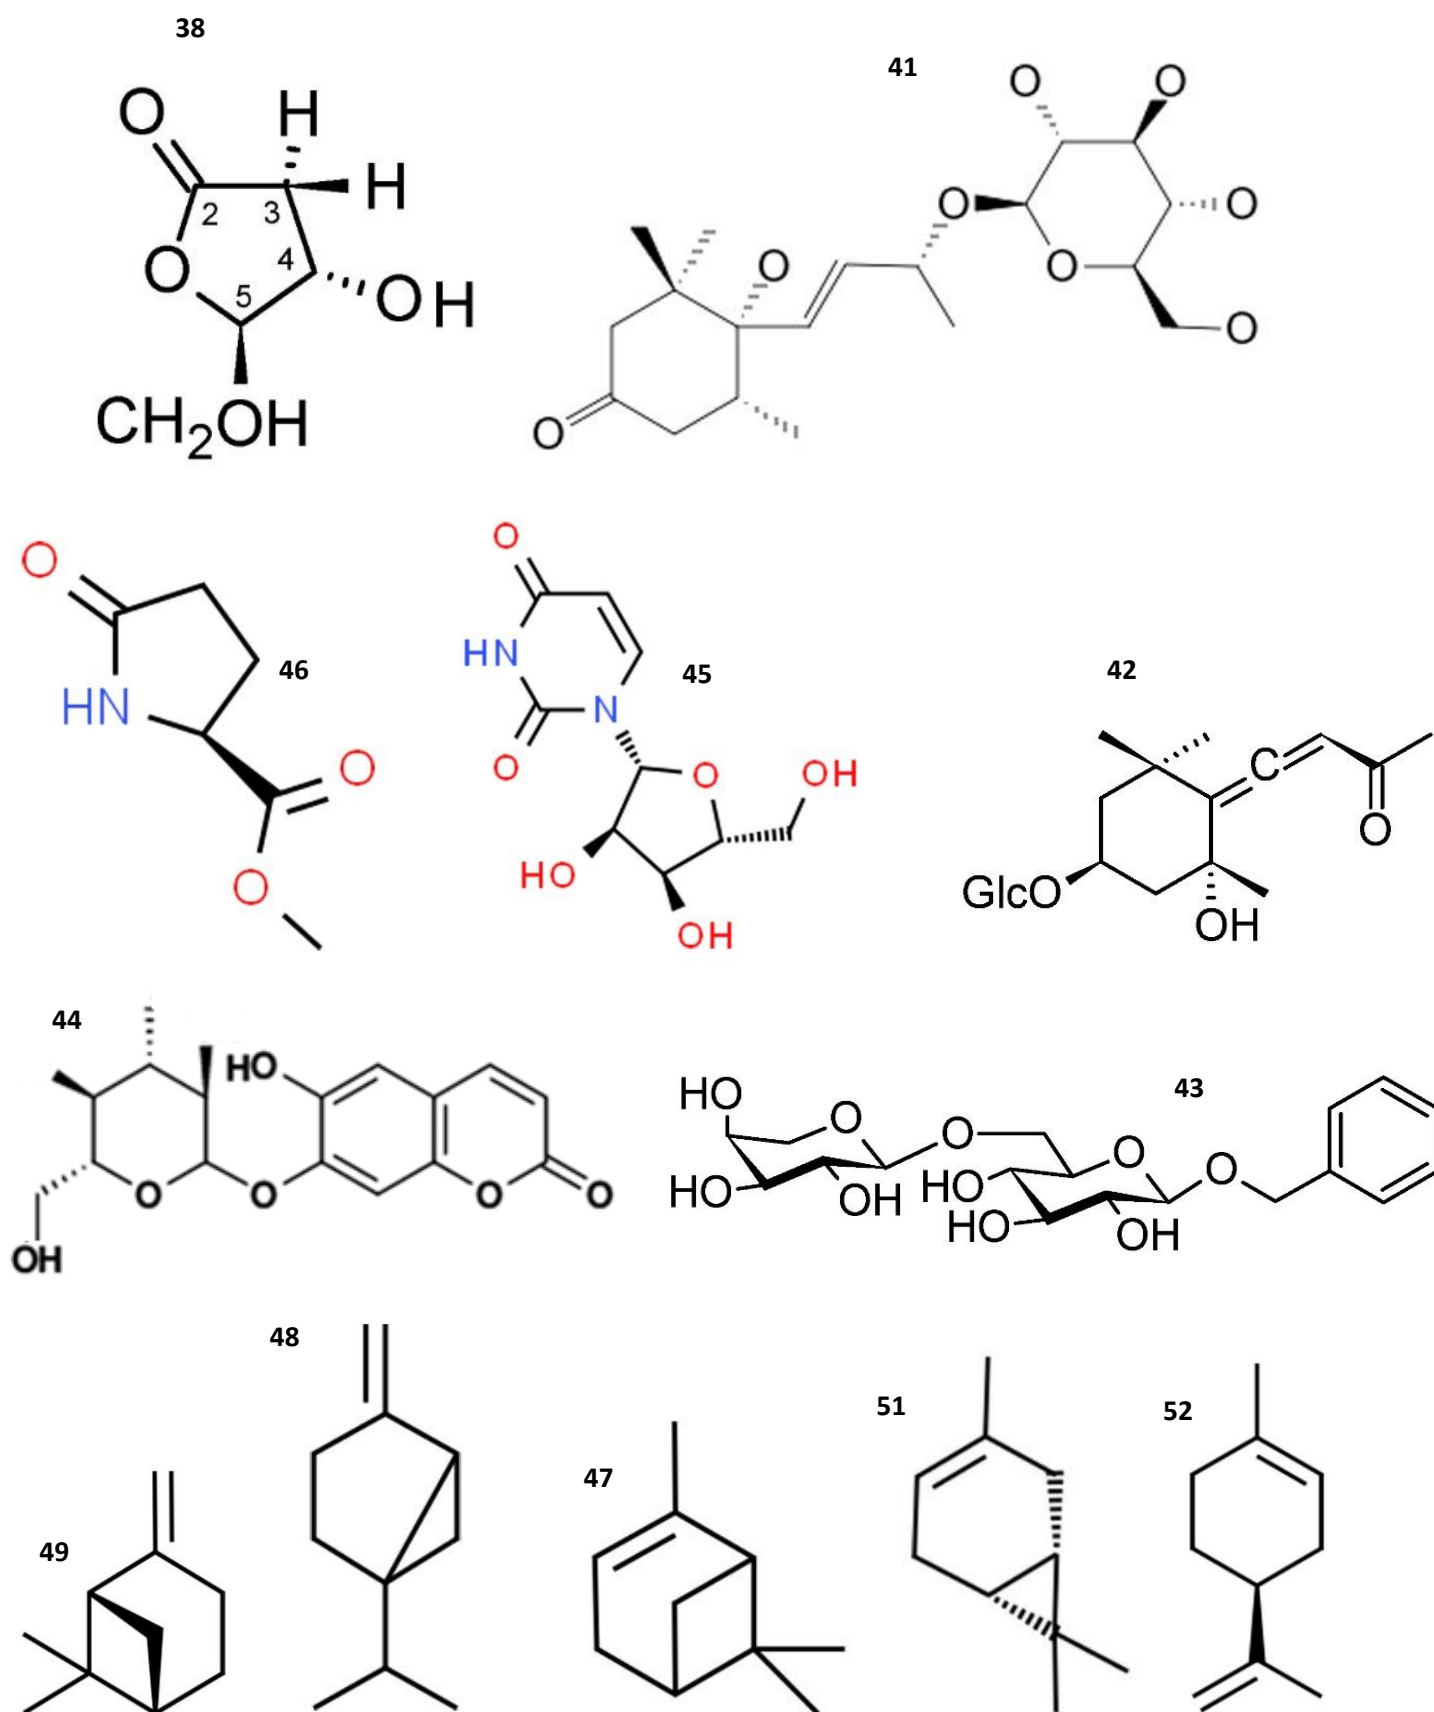

Figure S1: Structure of phytochemicals in *S. acmella*

# SUPPLEMENTARY MATERIAL (S1)

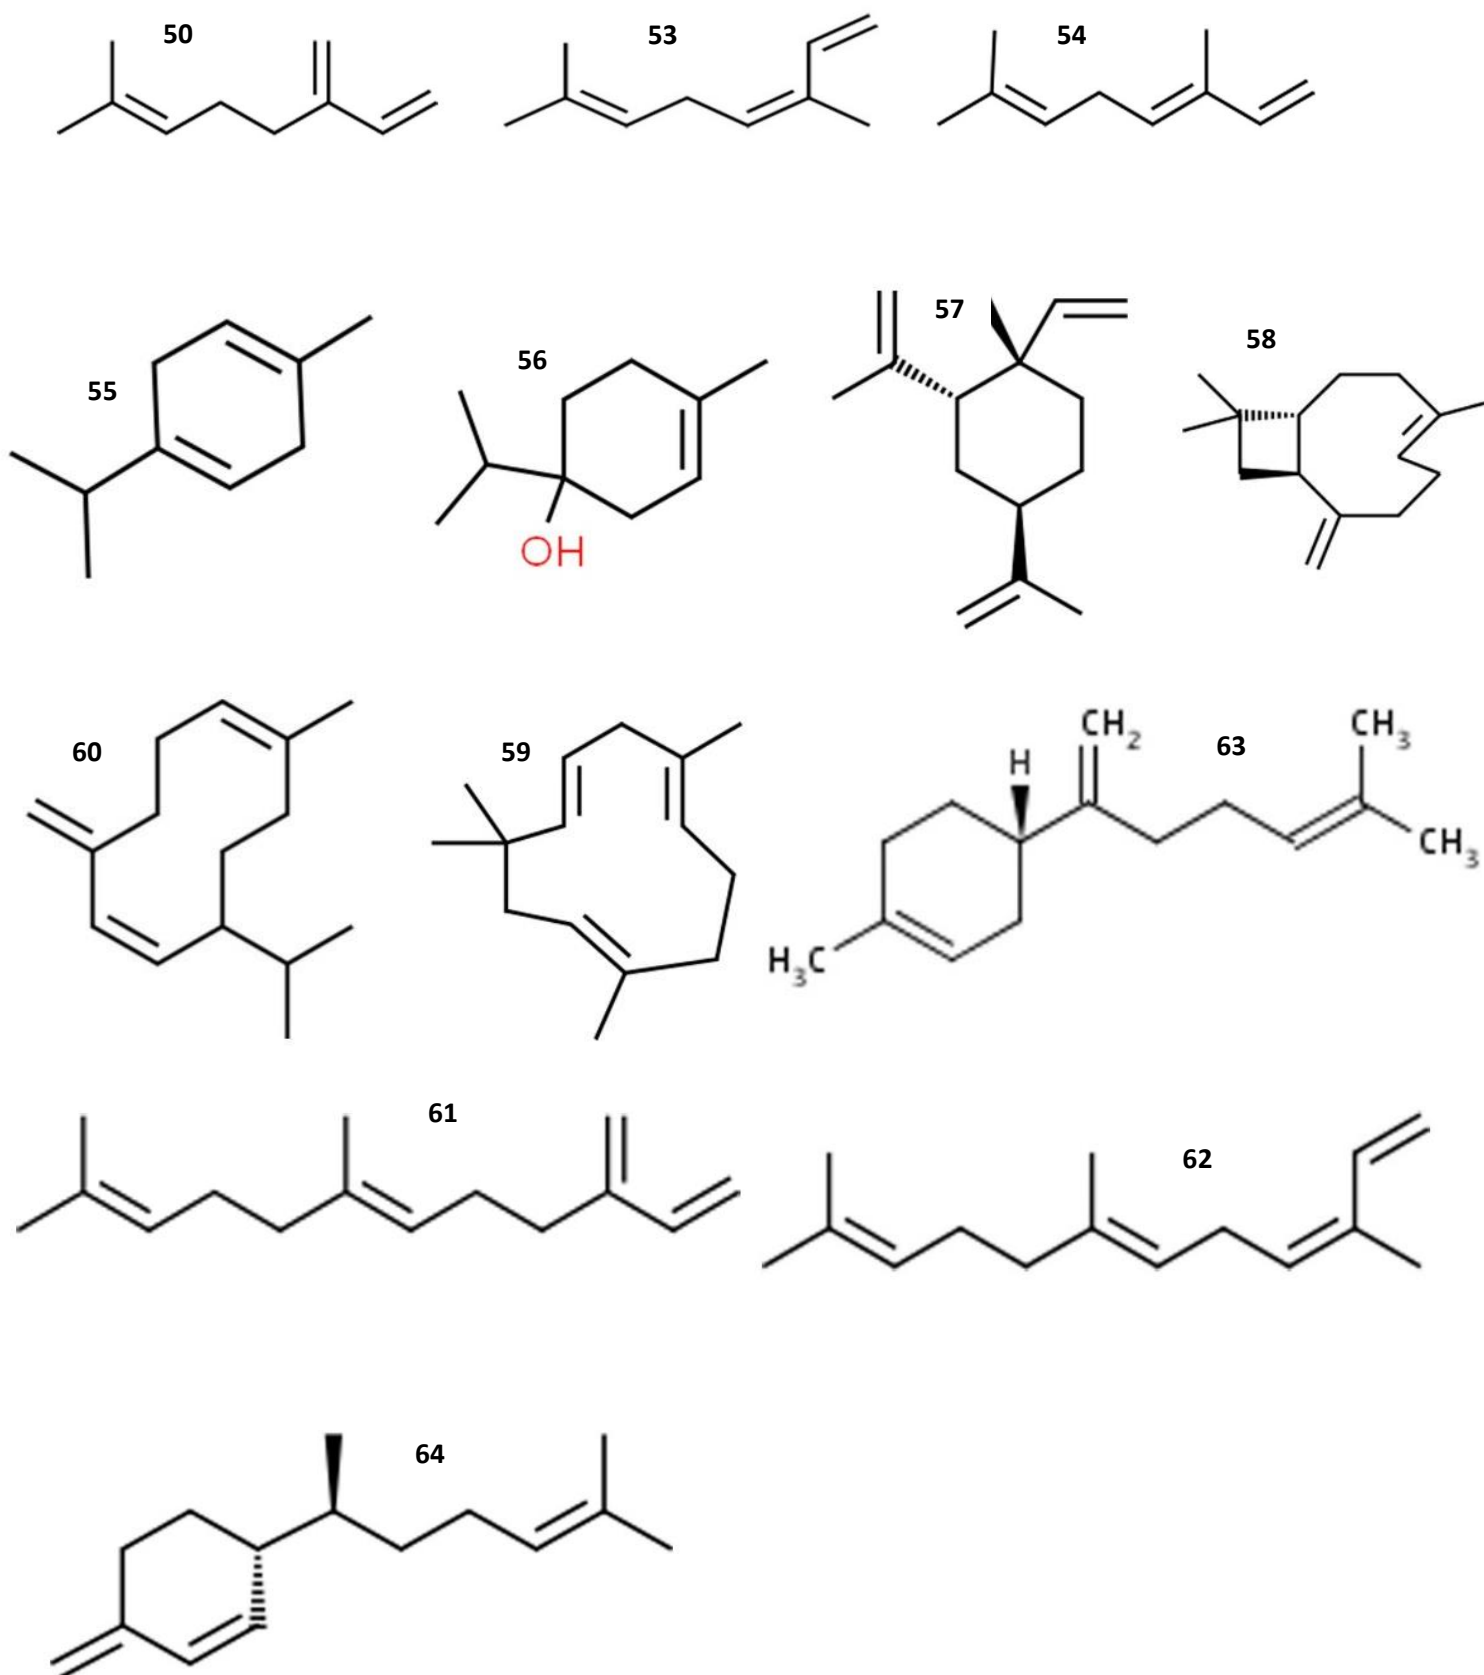

Figure S1: Structure of phytochemicals in *S. acmella*
